# Supplementary material
Source: PubMed Central journal article supplement (PMC5555228)
Supplement: NIHMS886333-supplement-Supplemental_Tables.pdf [file NIHMS886333-supplement-Supplemental_Tables.pdf]

Table S1.1. Pasteurized almond skin flavonoid and phenolic acid content.

| Flavonoid or phenolic acid | Content of Treated Almonds (µg/g almond skin) |                |               |                |
|----------------------------|-----------------------------------------------|----------------|---------------|----------------|
|                            | Raw                                           | PF0            | S1            | S2             |
| CA                         | 201.4 ± 119.2                                 | 204.7 ± 74.6   | 185.3 ± 103.6 | 171.3 ± 118.1  |
| EP                         | 120.8 ± 41.4                                  | 98.8 ± 30.3    | 102.9 ± 39.3  | 92.1 ± 44.5    |
| PCA                        | 19.5 ± 3.2                                    | 31.1 ± 1.4     | 18.0 ± 2.5    | 16.8 ± 1.4     |
| pHBA                       | 4.9 ± 0.2                                     | 5.9 ± 0.8      | 4.1 ± 0.2     | 3.9 ± 0.5      |
| Q3R                        | 12.0 ± 3.9                                    | 9.3 ± 3.1      | 11.4 ± 4.6    | 10.4 ± 2.6     |
| N7Glu                      | 72.2 ± 26.6                                   | 59.0 ± 21.2    | 65.6 ± 23.6   | 62.7 ± 32.5    |
| Q3Gal                      | 12.7 ± 4.6                                    | 10.6 ± 2.8     | 11.2 ± 4.5    | 11.1 ± 5.1     |
| K3Gal                      | 13.3 ± 9.1                                    | 13.4 ± 7.5     | 14.6 ± 9.4    | 13.3 ± 10.9    |
| K3R                        | 243.5 ± 127.5                                 | 197.6 ± 128.4  | 193.5 ± 157.1 | 221.6 ± 136.5  |
| diOHK                      | 77.4 ± 19.8                                   | 58.9 ± 14.2    | 68.9 ± 8.9    | 63.9 ± 21.4    |
| Iso3R                      | 720.7 ± 124.8                                 | 615.4 ± 144.0  | 574.7 ± 194.0 | 659.8 ± 113.5  |
| K3Glu                      | 32.4 ± 11.1                                   | 27.6 ± 8.2     | 31.7 ± 14.0   | 41.8 ± 20.2    |
| Iso3Glu                    | 142.0 ± 109.5                                 | 131.2 ± 93.3   | 131.2 ± 114.2 | 123.8 ± 128.5  |
| E                          | 4.9 ± 0.6                                     | 3.8 ± 0.1      | 4.3 ± 0.5     | 4.4 ± 0.8      |
| Q                          | 1.4 ± 0.5                                     | 4.9 ± 1.3      | 191.6 ± 324.9 | 2.4 ± 1.4      |
| N                          | 120.4 ± 12.9                                  | 89.2 ± 13.3    | 102.2 ± 6.0   | 84.3 ± 38.8    |
| K                          | 3.1 ± 1.6                                     | 5.7 ± 1.2      | 3.5 ± 1.9     | 3.0 ± 2.1      |
| Iso                        | 6.6 ± 5.6                                     | 16.9 ± 11.4    | 10.2 ± 11.4   | 7.7 ± 8.8      |
| Sum                        | 1809.1 ± 117.2                                | 1583.8 ± 109.6 | 1724.9 ± 56.5 | 1594.3 ± 244.7 |

Data is mean ± SD, n = 3 of Butte, Carmel, and Nonpareil cultivars. Abbreviations: CA-catechin, EC-epicatechin, DiOHK-dihydroxykaempferol, E- eriodictyol, Iso- isorhamnetin, Iso3Glu-isorhamnetin-3-O-glucoside, Iso3R-isorhamnetin-3-O-rutinoside, K- kaempferol, K3Gal- kaempferol-3-O-galactoside, K3Glu- kaempferol-3-O-glucoside, K3R-kaempferol-3-O-rutinoside, N-naringenin, N7Glu-naringenin-7-O-glucoside, PCA- procatechuic acid, pHBA- p-hydroxybenzoic acid, Q- quercetin, Q3Gal- quercetin-3-O-galactoside, Q3R- quercetin-3-O-rutinoside.

Table S1.2. Pasteurized almond flavonoid and phenolic acid content.

| Flavonoid or phenolic acid | Content of Treated Almonds (µg/100 g almonds) |                |                |                 |
|----------------------------|-----------------------------------------------|----------------|----------------|-----------------|
|                            | Raw                                           | PF0            | S1             | S2              |
| CA                         | 879.9 ± 520.8                                 | 894.7 ± 326.2  | 809.9 ± 452.9  | 748.8 ± 516.0   |
| EP                         | 528.1 ± 180.9                                 | 431.7 ± 132.4  | 449.7 ± 171.7  | 402.6 ± 194.3   |
| PCA                        | 85.1 ± 14.2                                   | 135.8 ± 6.0    | 78.9 ± 10.8    | 73.6 ± 5.9      |
| pHBA                       | 21.3 ± 0.7                                    | 25.9 ± 3.6     | 18.0 ± 1.0     | 17.1 ± 2.2      |
| Q3R                        | 52.5 ± 17.1                                   | 40.6 ± 13.5    | 49.7 ± 20.0    | 45.3 ± 11.5     |
| N7Glu                      | 315.6 ± 116.1                                 | 257.6 ± 92.7   | 286.8 ± 103.0  | 274.0 ± 142.1   |
| Q3Gal                      | 55.4 ± 20.0                                   | 46.3 ± 12.2    | 48.9 ± 19.9    | 48.4 ± 22.5     |
| K3Gal                      | 58.2 ± 39.9                                   | 58.7 ± 32.6    | 63.7 ± 41.0    | 57.9 ± 47.5     |
| K3R                        | 1064.0 ± 557.3                                | 863.4 ± 561.1  | 845.6 ± 686.3  | 968.3 ± 596.6   |
| diOHK                      | 338.1 ± 86.6                                  | 257.5 ± 62.0   | 301.0 ± 38.8   | 279.2 ± 93.6    |
| Iso3R                      | 3149.4 ± 545.6                                | 2689.3 ± 629.4 | 2511.4 ± 848.0 | 2883.2 ± 495.8  |
| K3Glu                      | 141.6 ± 48.6                                  | 120.4 ± 35.6   | 138.7 ± 61.1   | 182.8 ± 88.2    |
| Iso3Glu                    | 620.4 ± 478.4                                 | 573.1 ± 407.8  | 573.5 ± 499.2  | 541.0 ± 561.7   |
| E                          | 21.2 ± 2.6                                    | 16.7 ± 0.6     | 18.7 ± 2.1     | 19.2 ± 3.4      |
| Q                          | 6.0 ± 2.4                                     | 21.2 ± 5.8     | 837.1 ± 1419.7 | 10.3 ± 5.9      |
| N                          | 526.2 ± 56.4                                  | 389.6 ± 58.3   | 446.7 ± 26.1   | 368.5 ± 169.5   |
| K                          | 13.8 ± 7.0                                    | 24.8 ± 5.4     | 15.2 ± 8.1     | 13.2 ± 9.3      |
| Iso                        | 28.9 ± 24.4                                   | 73.9 ± 50.0    | 44.6 ± 50.0    | 33.7 ± 38.5     |
| Sum                        | 7905.6 ± 512.3                                | 6921.4 ± 478.9 | 7538.0 ± 247.0 | 6967.1 ± 1069.5 |

Data is mean ± SD, n = 3 of Butte, Carmel, and Nonpareil cultivars. Abbreviations as in Table S1.1.

**Table S2.1. Raw and roasted almond skin flavonoid and phenolic acid content.**

| Flavonoid or phenolic acid | Content of Treated Almonds ( $\mu\text{g/g}$ skin) |  |                    |  |
|----------------------------|----------------------------------------------------|--|--------------------|--|
|                            | Raw                                                |  | Roasted            |  |
| CA                         | 181.0 $\pm$ 94.7                                   |  | 196.7 $\pm$ 72.5   |  |
| EP                         | 101.9 $\pm$ 35.5                                   |  | 96.1 $\pm$ 32.5    |  |
| PCA                        | 18.9 $\pm$ 2.4                                     |  | 30.4 $\pm$ 6.3     |  |
| pHBA                       | 4.5 $\pm$ 0.5                                      |  | 6.2 $\pm$ 1.0      |  |
| Q3R                        | 9.8 $\pm$ 3.6                                      |  | 9.5 $\pm$ 2.9      |  |
| N7Glu                      | 51.4 $\pm$ 23.5                                    |  | 54.0 $\pm$ 20.1    |  |
| Q3Gal                      | 9.8 $\pm$ 4.0                                      |  | 10.2 $\pm$ 3.7     |  |
| K3Gal                      | 10.0 $\pm$ 6.5                                     |  | 12.6 $\pm$ 6.0     |  |
| K3R                        | 210.5 $\pm$ 109.1                                  |  | 195.7 $\pm$ 109.0  |  |
| diOHK                      | 59.7 $\pm$ 21.7                                    |  | 57.9 $\pm$ 18.0    |  |
| Iso3R                      | 641.1 $\pm$ 125.0                                  |  | 601.9 $\pm$ 113.9  |  |
| K3Glu                      | 26.0 $\pm$ 10.9                                    |  | 27.5 $\pm$ 9.3     |  |
| Iso3Glu                    | 124.1 $\pm$ 97.5                                   |  | 126.7 $\pm$ 91.6   |  |
| E                          | 3.7 $\pm$ 1.4                                      |  | 3.6 $\pm$ 1.1      |  |
| Q                          | 1.3 $\pm$ 0.7                                      |  | 4.0 $\pm$ 2.0      |  |
| N                          | 93.1 $\pm$ 24.3                                    |  | 85.4 $\pm$ 12.9    |  |
| K                          | 2.8 $\pm$ 1.8                                      |  | 5.0 $\pm$ 2.2      |  |
| Iso                        | 7.1 $\pm$ 7.2                                      |  | 14.2 $\pm$ 11.2    |  |
| <i>Sum</i>                 | 1556.8 $\pm$ 182.6                                 |  | 1537.4 $\pm$ 145.9 |  |

Data is mean  $\pm$  SD, n = 12 of Butte, Carmel, and Nonpareil cultivars. Abbreviations as in Table S1.1.

**Table S2.2. Raw and roasted almond skin flavonoid and phenolic acid content.**

| Flavonoid or phenolic acid | Content of Treated Almonds ( $\mu\text{g}/100$ g almonds) |  |                    |  |
|----------------------------|-----------------------------------------------------------|--|--------------------|--|
|                            | Raw                                                       |  | Roasted            |  |
| CA                         | 714.9 $\pm$ 374.2                                         |  | 785.0 $\pm$ 289.1  |  |
| EP                         | 402.6 $\pm$ 140.0                                         |  | 383.3 $\pm$ 129.6  |  |
| PCA                        | 74.8 $\pm$ 9.6                                            |  | 121.3 $\pm$ 25.2   |  |
| pHBA                       | 17.9 $\pm$ 1.9                                            |  | 24.6 $\pm$ 4.2     |  |
| Q3R                        | 38.8 $\pm$ 14.3                                           |  | 37.8 $\pm$ 11.5    |  |
| N7Glu                      | 202.9 $\pm$ 93.0                                          |  | 215.3 $\pm$ 80.4   |  |
| Q3Gal                      | 38.7 $\pm$ 15.8                                           |  | 40.6 $\pm$ 14.8    |  |
| K3Gal                      | 39.7 $\pm$ 25.8                                           |  | 50.1 $\pm$ 24.0    |  |
| K3R                        | 831.6 $\pm$ 431.1                                         |  | 781.0 $\pm$ 434.7  |  |
| diOHK                      | 235.8 $\pm$ 85.9                                          |  | 231.1 $\pm$ 71.7   |  |
| Iso3R                      | 2532.4 $\pm$ 493.6                                        |  | 2401.6 $\pm$ 454.4 |  |
| K3Glu                      | 102.7 $\pm$ 43.0                                          |  | 109.8 $\pm$ 37.3   |  |
| Iso3Glu                    | 490.4 $\pm$ 385.3                                         |  | 505.6 $\pm$ 365.5  |  |
| E                          | 14.8 $\pm$ 5.7                                            |  | 14.5 $\pm$ 4.2     |  |
| Q                          | 4.9 $\pm$ 2.9                                             |  | 15.8 $\pm$ 7.9     |  |
| N                          | 367.7 $\pm$ 96.2                                          |  | 340.6 $\pm$ 51.3   |  |
| K                          | 10.9 $\pm$ 7.0                                            |  | 19.8 $\pm$ 8.7     |  |
| Iso                        | 27.9 $\pm$ 28.6                                           |  | 56.7 $\pm$ 44.8    |  |
| <i>Sum</i>                 | 6149.3 $\pm$ 721.1                                        |  | 6134.4 $\pm$ 582.1 |  |

Data is mean  $\pm$  SD, n = 12 of Butte, Carmel, and Nonpareil cultivars. Abbreviations as in Table S1.1.

**Table S3.1. Almond skin flavonoid and phenolic acid content during storage at 4 °C.**

| Flavonoid or phenolic acid | Content at Time Point (µg/g almond skin) |                       |                       |                       |      |  |       |  |
|----------------------------|------------------------------------------|-----------------------|-----------------------|-----------------------|------|--|-------|--|
|                            | 0 mo                                     |                       | 3 mo                  |                       | 9 mo |  | 15 mo |  |
| CA                         | 184.3 ± 97.9                             | 198.2 ± 130.4         | 236.8 ± 143.1         | 277.6 ± 157.3         |      |  |       |  |
| EP                         | 68.6 ± 32.5                              | 67.7 ± 39.8           | 69.6 ± 35.2           | 88.2 ± 50.1           |      |  |       |  |
| PCA                        | 44.6 ± 15.3                              | 28.1 ± 9.9            | 15.0 ± 4.9            | 24.9 ± 9.0            |      |  |       |  |
| pHBA                       | 4.0 ± 0.9                                | 4.0 ± 1.2             | 48.6 ± 17.5           | 75.2 ± 25.0           |      |  |       |  |
| Q3R                        | 8.1 ± 3.5                                | 8.8 ± 4.2             | 5.6 ± 2.5             | 8.5 ± 3.1             |      |  |       |  |
| N7Glu                      | 35.8 ± 20.4                              | 41.5 ± 24.8           | 45.8 ± 27.8           | 58.9 ± 33.3           |      |  |       |  |
| Q3Gal                      | 6.4 ± 4.7                                | 10.0 ± 5.8            | 11.3 ± 9.1            | 16.0 ± 10.8           |      |  |       |  |
| K3Gal                      | 7.2 ± 6.3                                | 7.7 ± 6.2             | 6.4 ± 4.8             | 8.8 ± 7.6             |      |  |       |  |
| K3R                        | 196.2 ± 154.5                            | 193.9 ± 136.1         | 280.6 ± 208.6         | 295.0 ± 217.6         |      |  |       |  |
| diOHK                      | 49.9 ± 26.6                              | 41.4 ± 19.6           | 110.7 ± 52.7          | 116.6 ± 52.3          |      |  |       |  |
| Iso3R                      | 638.6 ± 201.1                            | 658.2 ± 189.6         | 1183.6 ± 341.7        | 1273.8 ± 364.7        |      |  |       |  |
| K3Glu                      | 23.2 ± 11.8                              | 26.5 ± 14.9           | 22.4 ± 12.6           | 29.1 ± 15.7           |      |  |       |  |
| Iso3Glu                    | 139.0 ± 141.9                            | 158.2 ± 150.7         | 219.9 ± 233.9         | 315.1 ± 324.7         |      |  |       |  |
| E                          | 2.7 ± 1.1                                | 3.1 ± 1.3             | 3.9 ± 1.6             | 4.9 ± 1.8             |      |  |       |  |
| Q                          | 3.1 ± 0.9                                | 3.0 ± 1.2             | 4.2 ± 1.7             | 2.2 ± 0.8             |      |  |       |  |
| N                          | 83.4 ± 41.3                              | 105.2 ± 45.9          | 50.8 ± 22.8           | 36.3 ± 14.8           |      |  |       |  |
| K                          | 2.4 ± 2.0                                | 3.2 ± 3.1             | 3.7 ± 3.8             | 4.8 ± 4.5             |      |  |       |  |
| Iso                        | 10.9 ± 18.7                              | 12.5 ± 18.8           | 2.3 ± 5.1             | 8.1 ± 13.9            |      |  |       |  |
| <b>Sum</b>                 | <b>1508.5 ± 410.7</b>                    | <b>1571.4 ± 448.7</b> | <b>2321.0 ± 618.2</b> | <b>2643.9 ± 659.2</b> |      |  |       |  |

Data is mean ± SD, n = 13 of 7 almond cultivars. Abbreviations as in Table S1.1.

**Table S3.2. Almond skin flavonoid and phenolic acid content during storage at 23 °C.**

| Flavonoid or phenolic acid | Content at Time Point (µg/g almond skin) |                       |                       |                       |      |  |       |  |
|----------------------------|------------------------------------------|-----------------------|-----------------------|-----------------------|------|--|-------|--|
|                            | 0 mo                                     |                       | 3 mo                  |                       | 9 mo |  | 15 mo |  |
| CA                         | 184.3 ± 97.9                             | 220.4 ± 126.2         | 220.5 ± 112.9         | 338.3 ± 189.9         |      |  |       |  |
| EP                         | 68.6 ± 32.5                              | 88.9 ± 47.4           | 64.6 ± 34.5           | 103.2 ± 48.8          |      |  |       |  |
| PCA                        | 44.6 ± 15.3                              | 44.4 ± 11.1           | 28.0 ± 4.0            | 50.4 ± 8.9            |      |  |       |  |
| pHBA                       | 4.0 ± 0.9                                | 4.2 ± 0.9             | 91.8 ± 23.6           | 169.8 ± 25.3          |      |  |       |  |
| Q3R                        | 8.1 ± 3.5                                | 8.0 ± 3.1             | 5.7 ± 2.3             | 12.3 ± 10.8           |      |  |       |  |
| N7Glu                      | 35.8 ± 20.4                              | 41.8 ± 25.3           | 48.6 ± 29.1           | 65.7 ± 36.4           |      |  |       |  |
| Q3Gal                      | 6.4 ± 4.7                                | 8.8 ± 6.6             | 11.7 ± 10.1           | 19.4 ± 15.5           |      |  |       |  |
| K3Gal                      | 7.2 ± 6.3                                | 8.0 ± 7.2             | 6.2 ± 5.3             | 10.7 ± 7.0            |      |  |       |  |
| K3R                        | 196.2 ± 154.5                            | 185.0 ± 139.2         | 261.9 ± 186.7         | 316.8 ± 223.6         |      |  |       |  |
| diOHK                      | 49.9 ± 26.6                              | 41.9 ± 22.1           | 112.1 ± 50.2          | 123.8 ± 57.1          |      |  |       |  |
| Iso3R                      | 638.6 ± 201.1                            | 598.6 ± 185.1         | 1138.0 ± 325.7        | 1360.6 ± 407.0        |      |  |       |  |
| K3Glu                      | 23.2 ± 11.8                              | 24.0 ± 14.1           | 22.7 ± 12.0           | 52.1 ± 47.6           |      |  |       |  |
| Iso3Glu                    | 139.0 ± 141.9                            | 164.0 ± 169.0         | 219.3 ± 235.5         | 325.0 ± 376.1         |      |  |       |  |
| E                          | 2.7 ± 1.1                                | 2.6 ± 1.1             | 4.2 ± 1.7             | 5.2 ± 2.0             |      |  |       |  |
| Q                          | 3.1 ± 0.9                                | 2.5 ± 0.6             | 3.9 ± 1.7             | 2.4 ± 0.9             |      |  |       |  |
| N                          | 83.4 ± 41.3                              | 90.1 ± 41.4           | 46.0 ± 19.3           | 39.7 ± 16.8           |      |  |       |  |
| K                          | 2.4 ± 2.0                                | 2.4 ± 2.4             | 4.4 ± 4.6             | 5.2 ± 4.6             |      |  |       |  |
| Iso                        | 10.9 ± 18.7                              | 9.0 ± 13.7            | 3.4 ± 8.5             | 9.3 ± 15.6            |      |  |       |  |
| <b>Sum</b>                 | <b>1508.5 ± 410.7</b>                    | <b>1544.6 ± 459.3</b> | <b>2292.9 ± 601.0</b> | <b>3009.9 ± 825.7</b> |      |  |       |  |

Data is mean ± SD, n = 13 of 7 almond cultivars. Abbreviations as in Table S1.1.

**Table S4. Almond flavonoid and phenolic acid content of equivalently stored harvest years.**

| Flavonoid or phenolic acid | Content by Year ( $\mu\text{g}/100\text{ g almonds}$ ) |        |               |        | P-value  |
|----------------------------|--------------------------------------------------------|--------|---------------|--------|----------|
|                            | 2006 (15 mo)                                           |        | 2007 (15 mo)  |        |          |
| CA                         | 891.8 $\pm$                                            | 866.8  | 1318.8 $\pm$  | 736.2  | 0.1885   |
| EP                         | 487.5 $\pm$                                            | 122.0  | 403.5 $\pm$   | 197.1  | 0.2035   |
| PCA                        | 58.9 $\pm$                                             | 9.6    | 195.4 $\pm$   | 33.1   | 3.14E-13 |
| pHBA                       | 15.6 $\pm$                                             | 2.2    | 659.6 $\pm$   | 105.8  | 2.14E-17 |
| Q3R                        | 66.8 $\pm$                                             | 24.1   | 47.9 $\pm$    | 42.6   | 0.1752   |
| N7Glu                      | 220.7 $\pm$                                            | 135.9  | 261.1 $\pm$   | 162.6  | 0.4988   |
| Q3Gal                      | 54.5 $\pm$                                             | 40.5   | 75.3 $\pm$    | 57.7   | 0.2961   |
| K3Gal                      | 39.0 $\pm$                                             | 21.5   | 42.4 $\pm$    | 29.9   | 0.7458   |
| K3R                        | 670.9 $\pm$                                            | 469.1  | 1214.4 $\pm$  | 836.7  | 0.0522   |
| diOHK                      | 287.2 $\pm$                                            | 87.1   | 491.5 $\pm$   | 263.5  | 0.0139   |
| Iso3R                      | 2698.7 $\pm$                                           | 727.5  | 5264.1 $\pm$  | 1511.2 | 1.14E-05 |
| K3Glu                      | 124.1 $\pm$                                            | 53.4   | 204.3 $\pm$   | 187.5  | 0.1510   |
| Iso3Glu                    | 686.5 $\pm$                                            | 576.4  | 1280.8 $\pm$  | 1464.1 | 0.1859   |
| E                          | 17.5 $\pm$                                             | 7.8    | 20.2 $\pm$    | 8.4    | 0.3911   |
| Q                          | 19.2 $\pm$                                             | 6.8    | 9.5 $\pm$     | 3.6    | 0.0001   |
| N                          | 436.0 $\pm$                                            | 142.3  | 155.6 $\pm$   | 69.1   | 1.31E-06 |
| K                          | 15.8 $\pm$                                             | 17.9   | 20.4 $\pm$    | 17.8   | 0.5245   |
| Iso                        | 65.5 $\pm$                                             | 105.6  | 35.8 $\pm$    | 57.9   | 0.3829   |
| <i>Sum</i>                 | 6856.2 $\pm$                                           | 1926.8 | 11700.4 $\pm$ | 3246.3 | 0.0001   |

Data is mean  $\pm$  SD, n = 13 of 7 almond cultivars, significance by paired t-test. Abbreviations as in Table S1.1.
